# Supplementary material
Source: Royal Society of Chemistry journal article supplement (doi:10.1039/d6tc00042h)
Supplement: d6tc00042h1.pdf [file d6tc00042h1.pdf]

*Supporting Information*

**Synergistic NH<sub>4</sub>F and ZnCl<sub>2</sub>-assisted surface engineering enables efficient red ZnSeTe quantum dots for QLEDs**

*Zhengtuan Chen<sup>#</sup>, Yi Liang<sup>#</sup>, Chenglin Lai, Yuhe Bi, Yusheng Song, Sheng Cao\*, Jialong Zhao\**

School of Physical Science and Technology, State Key Laboratory of Featured Metal Materials and Life-cycle Safety for Composite Structures, Guangxi University, Nanning, 530004, China.

Corresponding Author \*E-mail: caosheng@gxu.edu.cn (S. C.); zhaojl@gxu.edu.cn(J. Z.)

<sup>#</sup> The authors contributed equally to this work.

## **Experimental section**

### **Materials**

Zinc acetate ( $\text{Zn}(\text{OAc})_2$ , 99.99%), sulfur powder (S, 99.999%), selenium powder (Se, 99.999%), trioctylphosphine (TOP, 90%), tellurium (Te, 99.999%), tri-n-octylamine (TOA, 97%), oleylamine (OLA, 80-90%), oleic acid (OA, 90%), 1-octadecene (ODE, 90%), n-hexane (AR), 1-dodecanethiol (98%), octane (99%), diphenylphosphine (DPP, 95%), and tri[2-(diphenylphosphino)ethyl]phosphine were purchased from Aladdin. Poly(3,4-ethylenedioxythiophene):poly(styrenesulfonate) (PEDOT:PSS), and poly(9,9-dioctylfluorene-co-N-(4-butylphenyl)diphenylamine) (TFB) were purchased from Aladdin Xi'an Polymer Light Technology. All of the above chemical raw materials were used without further purification.

### **Precursor Preparation**

*Zn(OA)<sub>2</sub> precursor:* 56 mmol of  $\text{Zn}(\text{OAc})_2$  was dissolved in 80 mL of a solvent mixture containing 42 mL of OA, 19 mL of TOA, and 19 mL of TOP. The solution was then subjected to vacuum treatment at 120 °C for 1.5 h, followed by switching to a nitrogen atmosphere and heating to 300 °C for 1 h of reaction. Subsequently, a 0.7 M zinc precursor solution was obtained and cooled for later use.

*Zn(OLA)<sub>2</sub> precursor:* A mixture of 44 mmol of  $\text{Zn}(\text{OAc})_2$ , 18 mL of OLA, and 90 mL of ODE was added to a 250 mL flask. The mixture was heated to 120 °C and degassed under reduced pressure for 1 h.

*Te-TOP and Se-TOP:* Appropriate amounts of Se and Te powders were weighed in a glovebox and mixed with TOP. The mixtures were stirred at room temperature until complete

dissolution, yielding TOP-Se (2 M) and TOP-Te (0.2 M) solutions. For another selenium precursor, an appropriate amount of Se powder was weighed, mixed with a suitable quantity of DPP, and stirred on a hotplate at about 120 °C for approximately 1 h until the Se powder dissolved, resulting in a DPP-Se (2 M) solution.

*NH<sub>4</sub>F precursor:* The NH<sub>4</sub>F precursor solution was prepared by dissolving 40 mmol of NH<sub>4</sub>F in 20 mL of OLA. The mixture was heated to 120 °C under argon atmosphere and stirred until complete dissolution was achieved.

*ZnCl<sub>2</sub> precursor:* The ZnCl<sub>2</sub> precursor solution was prepared by dissolving 1 mmol of anhydrous ZnCl<sub>2</sub> in a mixture of 5 mL of OLA. The mixture was heated to 120 °C under argon atmosphere and stirred until complete dissolution was achieved.

### **Synthesis of ZnSeTe/ZnSeTe<sub>inner</sub>/ZnSe/ZnS quantum dots**

Zn(OAc)<sub>2</sub> (0.458 g, 2.5 mmol), oleic acid (OA, 2.5 mL), and 1-octadecene (ODE, 15 mL) were added to a 100 mL three-neck flask. The mixture was evacuated under vacuum at 120 °C for 30 min, then the temperature was raised to 240 °C under a nitrogen atmosphere. A rapid injection of 0.25 mL Se-DPP and 5 mL Te-TOP (0.2 M) was performed, followed by nucleation for 60 min. After nucleation, auxiliary additives (0.4 mL NH<sub>4</sub>F (2 M) and/or 1 mL ZnCl<sub>2</sub> (0.5 M) were injected to obtain the corresponding samples QD-Pristine, QD-F, QD-Cl, and QD-F-Cl. The temperature was then raised to 260 °C, and 2 mL Zn(OA)<sub>2</sub> solution was injected. Subsequently, 0.6 mL Se-TOP (0.9 mL/h) and 1.2 mL Te-TOP (1.8 mL/h) were co-injected using a syringe pump. After the injection was complete, the reaction was maintained at 260 °C for 20 min. The temperature was further increased to 280 °C, and 12 mL Zn(OA)<sub>2</sub> solution was injected, followed by syringe-pump injection of 3 mL Se-TOP

(4.5 mL/h). The reaction was held at 280 °C for another 20 min. Next, the temperature was raised to 300 °C, and 4 mL Zn(OA)<sub>2</sub> solution was injected, after which 2 mL DDT was delivered via syringe pump (2 mL/h). The reaction was then cooled to 250 °C, and 4 mL Zn(OLA)<sub>2</sub> together with 4 mL octanethiol were injected and maintained for 60 min. After completion, the flask was cooled to room temperature. The crude quantum-dot solution was mixed with anhydrous ethanol in a 1:1 volume ratio, shaken thoroughly, and centrifuged at 4000 rpm for 4 min. The supernatant was discarded, and the precipitate was redispersed in 10 mL n-hexane for further characterization.

### **QLED fabrication**

QLED devices were fabricated with the following structure: ITO/PEDOT:PSS/TFB/QD/ZnMgO/Al. Each layer except the Al cathode was deposited on ITO glass by spin-coating; the Al cathode was thermally evaporated under vacuum. The detailed fabrication procedure is as follows: ITO glass substrates were sequentially ultrasonically cleaned in deionized water, acetone, isopropanol, and ethanol for 15 min each. Subsequently, the cleaned ITO glass was treated in a UV-ozone cleaner for 15 min to enhance surface wettability and cleanliness. PEDOT:PSS was spin-coated onto the ITO glass at 3000 rpm for 40 s. The film was then annealed in air at 130 °C for 20 min. A TFB solution (8 mg/mL in chlorobenzene) was spin-coated at 3000 rpm for 40 s. The TFB layer was annealed at 130 °C for 20 min inside a glovebox. The QD solution (35 mg/mL in n-octane) was spin-coated at 3000 rpm for 40 s. The QD layer was annealed in the glovebox at 80 °C for 5 min. Then, a ZnMgO solution (25 mg/mL in ethanol) was spin-coated at 3000 rpm for 40 s and heated at 80 °C for 10 min inside the glovebox. Finally, the device was transferred to a

thermal evaporator. Under a vacuum of  $5 \times 10^{-4}$  Pa, an Al cathode was deposited at a rate of 2 nm/s.

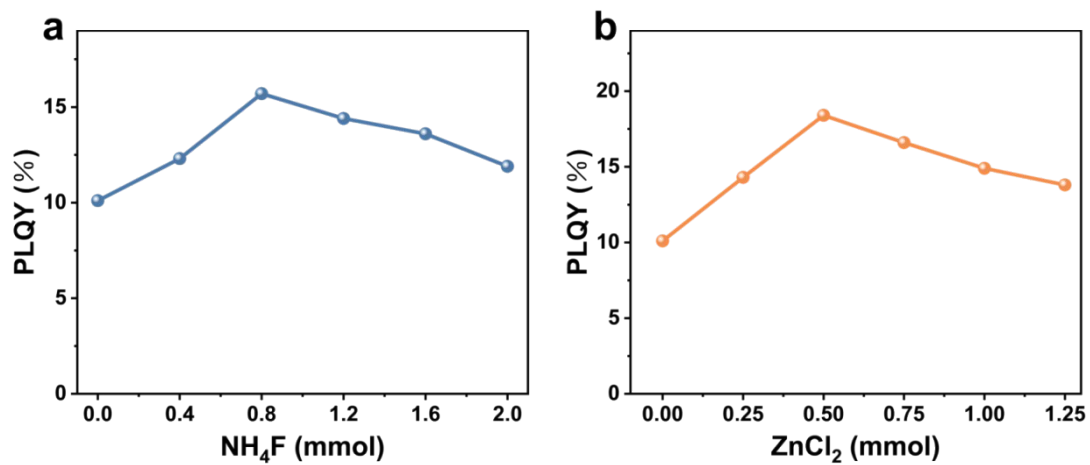

**Fig. S1.** PL QY of  $\text{ZnSeTe}/\text{ZnSeTe}_{\text{inner}}/\text{ZnSe}/\text{ZnS}$  core/shell QDs as a function of the amount of (a)  $\text{NH}_4\text{F}$  or (b)  $\text{ZnCl}_2$  added during the core treatment step.

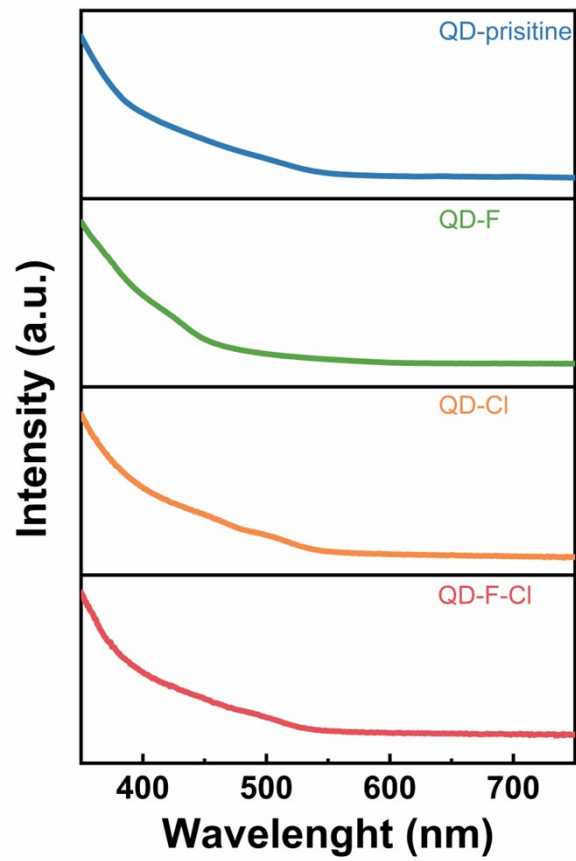

**Fig. S2** | Absorption spectra of ZnSeTe QD cores for QD-pristine, QD-F, QD-Cl and QD-F-Cl.

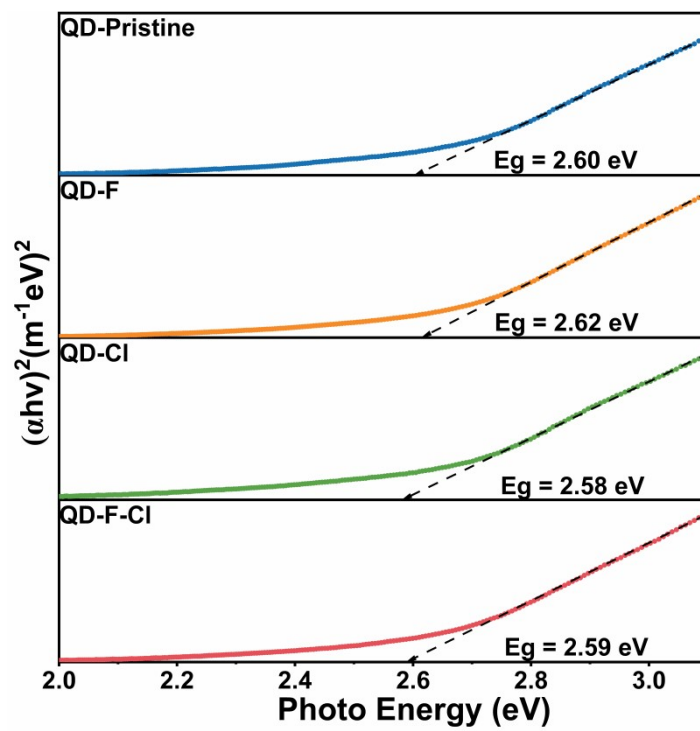

**Fig. S3.** Tauc plots of QD-Pristine, QD-F, QD-Cl, and QD-F-Cl.

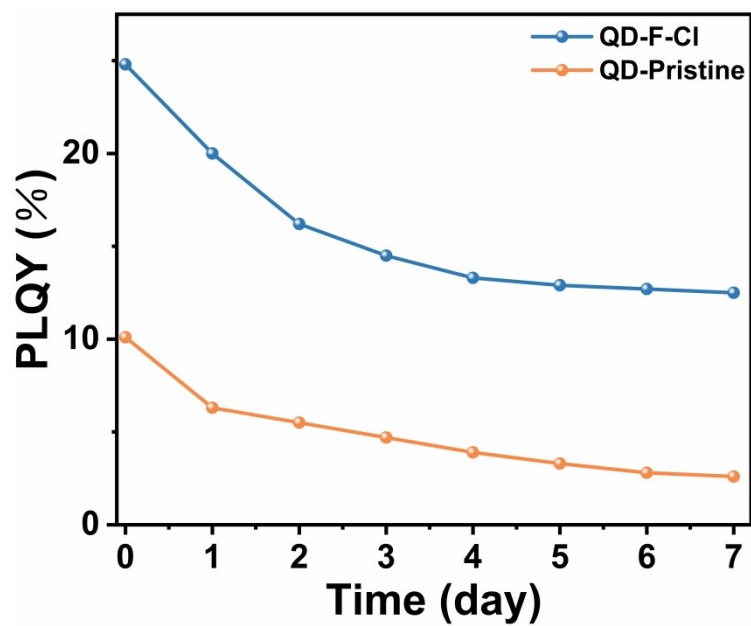

**Fig. S4** | Stability test of QDs without passivation treatment (QD-Pristine) and with passivation treatment (QD-F-Cl).

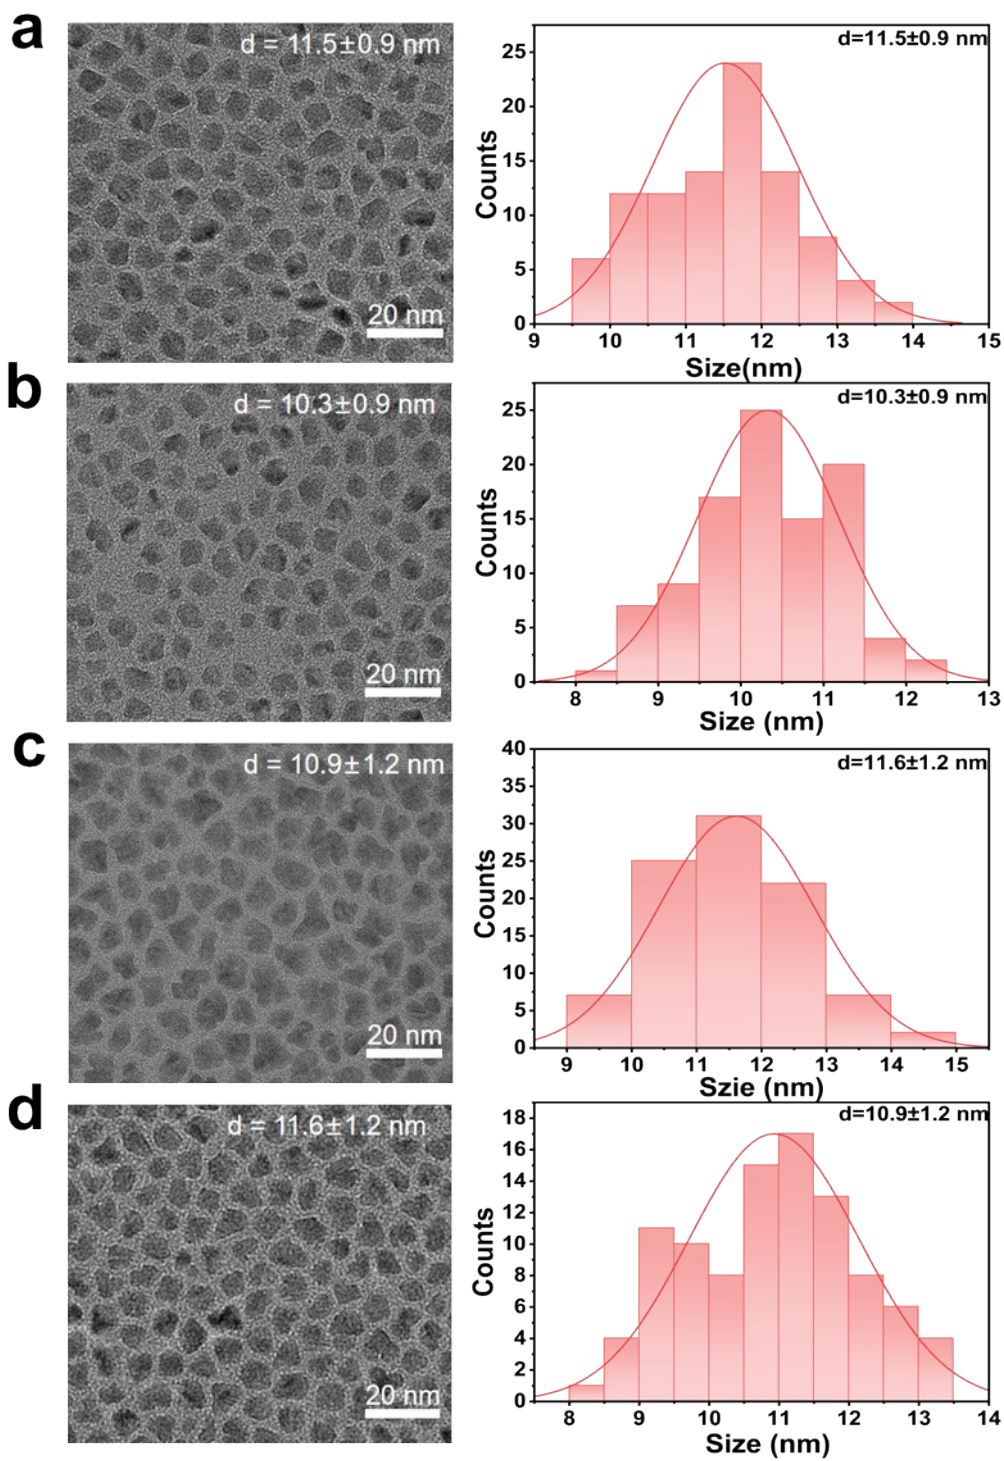

**Fig. S5.** TEM images and particle size distribution histograms of ZnSeTe QDs: (a) QD-Pristine, (b) QD-F, (c) QD-Cl, and (d) QD-F-Cl. Scale bars: 50 nm.

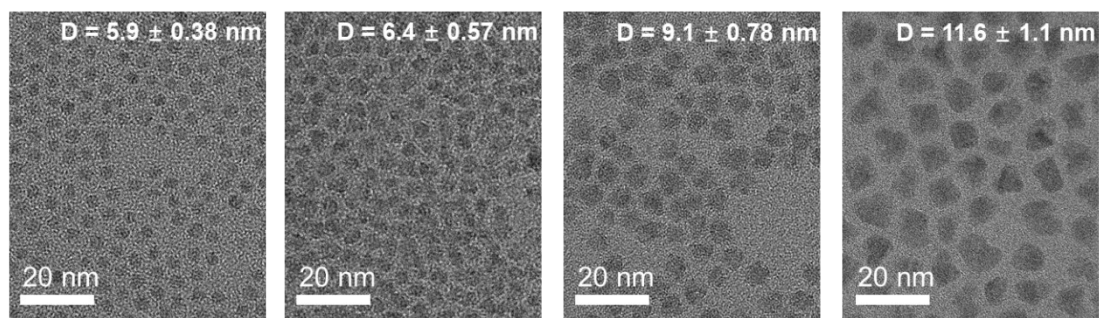

**Fig. S6** | TEM images of QDs (from left to right): ZnSeTe, ZnSeTe/ZnSeTe<sub>inner</sub>, ZnSeTe/ZnSeTe<sub>inner</sub>/ZnSe, and ZnSeTe/ZnSeTe<sub>inner</sub>/ZnSe/ZnS.

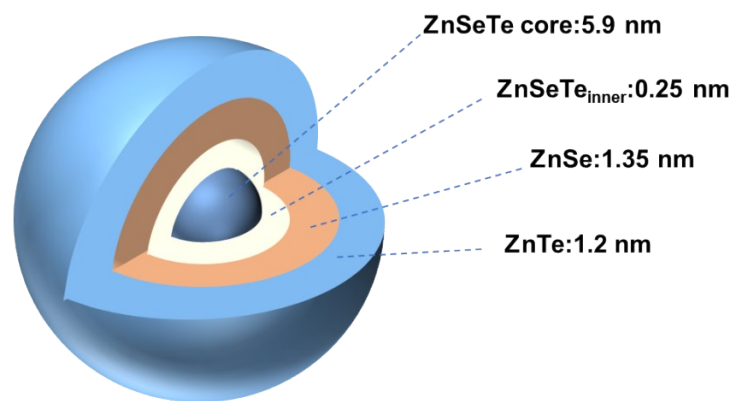

**Fig. S7** | Thickness of each shell layer of ZnSeTe/ZnSeTe<sub>inner</sub>/ZnSe/ZnS.

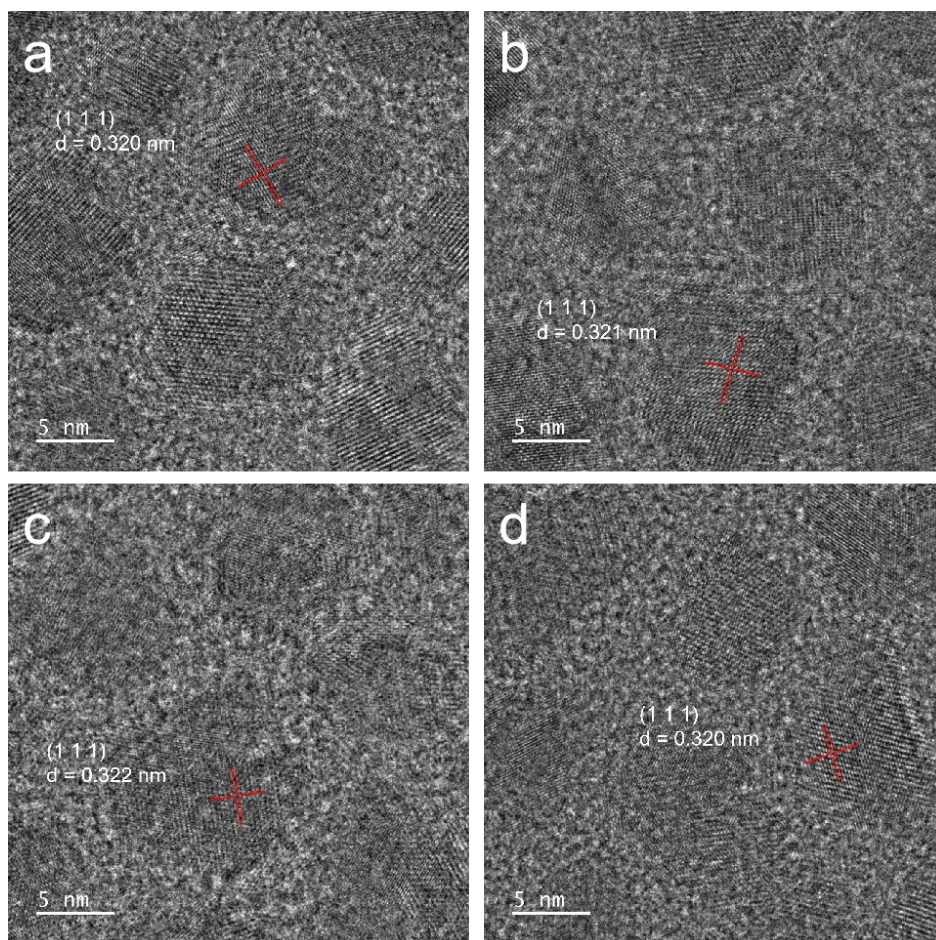

**Fig. S8.** High-resolution TEM images of ZnSeTe QDs: (a) QD-Pristine, (b) QD-F, (c) QD-Cl, and (d) QD-F-Cl. Scale bar: 5 nm.

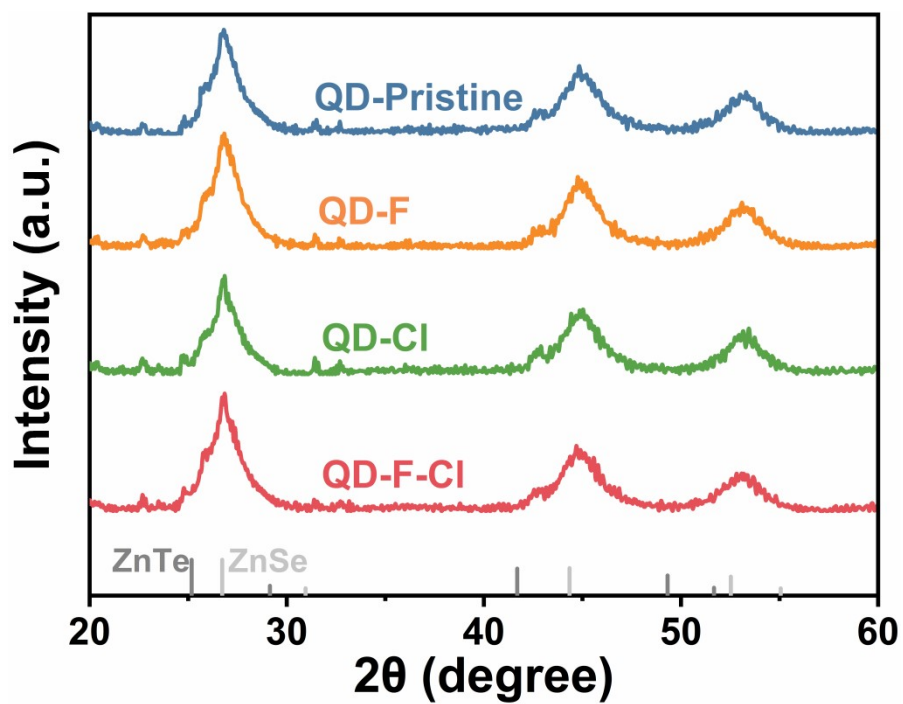

**Fig. S9.** XRD patterns of QD-Pristine, QD-F, QD-Cl, and QD-F-Cl.

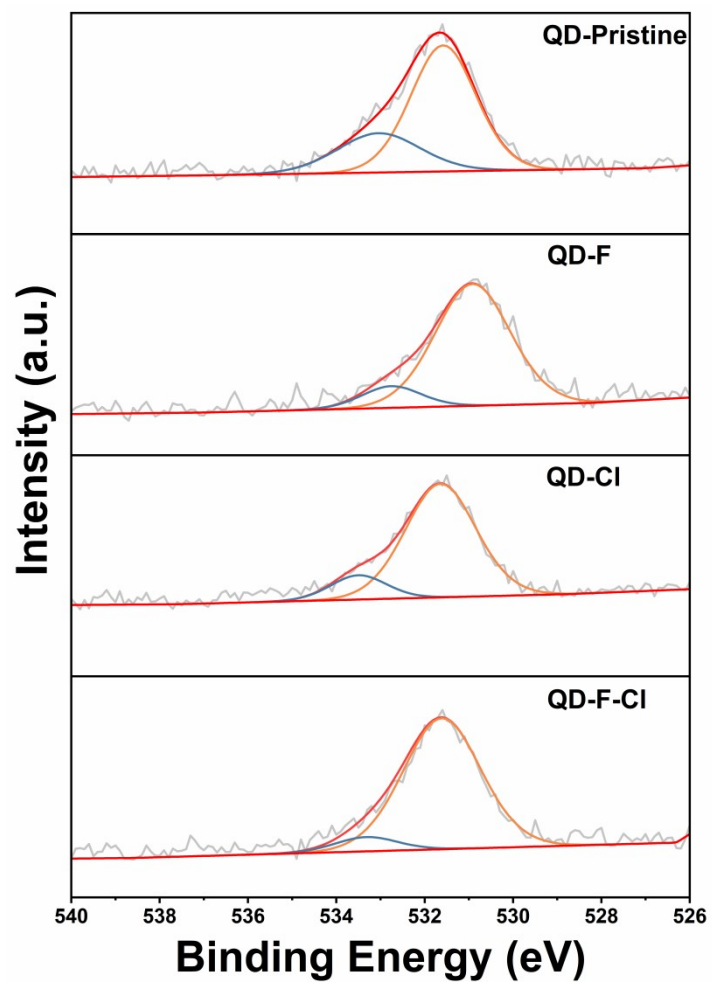

**Fig. S10** | XPS spectra of O 1s for QDs treatment with different additives.

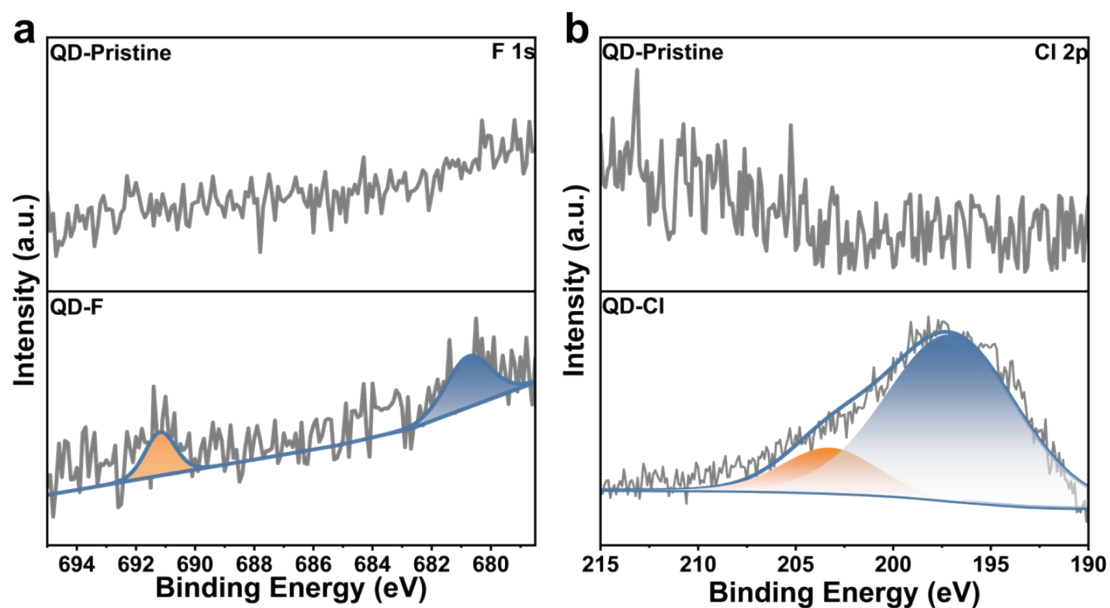

**Fig. S11.** (a) F 1s XPS spectra of QD-Pristine and QD-F; (b) Cl 2p XPS spectra of QD-Pristine and QD-Cl.

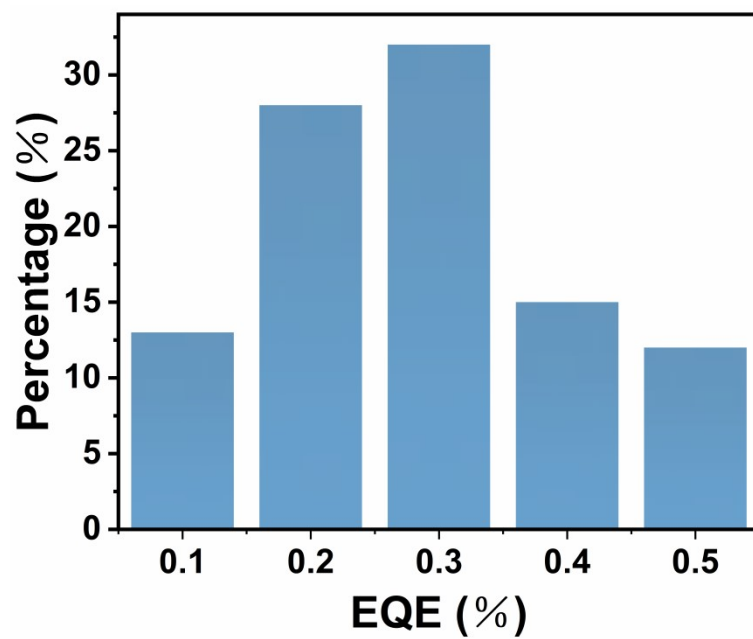

**Fig. S12.** Reproducibility of ZnSeTe/ZnSeTe<sub>inner</sub>/ZnSe/ZnS based QLEDs.

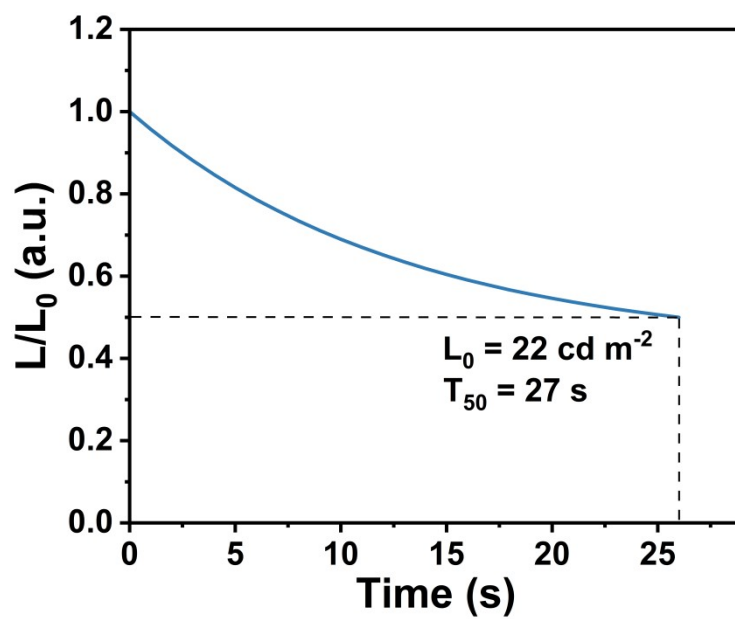

**Fig. S13** | Operational stability of ZnSeTe/ZnSeTe<sub>inner</sub>/ZnSe/ZnS based QLEDs.

**Table S1.** Parameters of TA lifetimes and decay components for QD-Pristine, QD-F, QD-Cl, and QD-F-Cl.

|             | $A_1$ (%) | $\tau_1$ (ps) | $A_2$ (%) | $\tau_2$ (ps) |
|-------------|-----------|---------------|-----------|---------------|
| QD-Pristine | 61        | 77.6          | 38.6      | 764.3         |
| QD-F        | 58.8      | 89.1          | 41.2      | 789.6         |
| QD-Cl       | 57.7      | 96.4          | 42.3      | 835.5         |
| QD-F-Cl     | 53.7      | 124.7         | 46.3      | 1123.9        |

**Table S2.** PL decay kinetics parameters for QD-Pristine, QD-F, QD-Cl, and QD-F-Cl.

|             | $A_1$ (%) | $\tau_1$ (ns) | $A_2$ (%) | $\tau_2$ (ns) | $T_{av}$ (ns) |
|-------------|-----------|---------------|-----------|---------------|---------------|
| QD-Pristine | 1         | 16.33         | 99        | 60.50         | 17.4          |
| QD-F        | 3         | 28.06         | 97        | 122.73        | 40.1          |
| QD-Cl       | 4         | 29.56         | 96        | 162.91        | 59.6          |
| QD-F-Cl     | 10        | 35.41         | 90        | 165.95        | 73.7          |

The PL decay curves of ZnSeTe QDs were fitted using a double-exponential function:

$$I(t) = A_1 \times \exp\left(-\frac{t}{\tau_1}\right) + A_2 \times \exp\left(-\frac{t}{\tau_2}\right) \#(1)$$

**Table S3.** Radiative and non-radiative recombination rate parameters for QD-Pristine, QD-F, QD-Cl, and QD-F-Cl.

|             | PLQY (%) | T <sub>av</sub> (ns) | K <sub>nr</sub> (ns <sup>-1</sup> ) |
|-------------|----------|----------------------|-------------------------------------|
| QD-Pristine | 10.1     | 17.4                 | 0.0516                              |
| QD-F        | 15.7     | 40.1                 | 0.0210                              |
| QD-Cl       | 18.4     | 59.6                 | 0.0136                              |
| QD-F-Cl     | 24.8     | 73.7                 | 0.0102                              |

The nonradiative recombination rates ( $k_{nr}$ ) were calculated by the following relations:

$$PLQY = \frac{k_r}{k_r + k_{nr}} \#(2)$$

$$k_r + k_{nr} = \frac{1}{\tau_{av}} \#(3)$$

**Table S4.** Performance comparison of red-emitting ZnSeTe QDs and QLEDs.

| Structure                                | PL Wavelength |           | EQE (%) | Ref              |
|------------------------------------------|---------------|-----------|---------|------------------|
|                                          | (nm)          | PL QY (%) |         |                  |
| ZnSeTe/ZnSeTe <sub>inner</sub> /ZnSe/ZnS | 612           | 63        | /       | (1)              |
| ZnSeTe/ZnSeTe <sub>inner</sub> /ZnSe/ZnS | 615           | 24.8      | 0.3     | <b>This work</b> |
| ZnSeTe/ZnTe/ZnSe/ZnS                     | 618           | 12        | /       | (2)              |

## References

1. Y.-H. Kim, S.-Y. Yoon, Y.-J. Lee, D.-Y. Jo, H.-M. Kim, Y. Kim, S. M. Park, G. M. Park, Y. Kim, J. Kim and H. Yang, *ACS Appl. Nano Mater.*, 2023, **6**, 19947-19954.
2. X.Song, Y.Qin, C.Yu, J.Ning, *J. Phys. Chem. Lett.*, 2025, 16(4): 1045-1050.
